**Corrigendum: *Water Supply* 20 (3), 909–921: Comparison study of artificial intelligence method for short term groundwater level prediction in the northeast Gachsaran unconfined aquifer, [https://iwaponline.com/ws/article/20/3/909/72227/Comparison-study-of-artificial-intelligence-method?searchresult = 1](https://iwaponline.com/ws/article/20/3/909/72227/Comparison-study-of-artificial-intelligence-method?searchresult=1)**

Akbar Khedri, Nasrollah Kalantari and Meysam Vadiati

Akbar Khedri  
Nasrollah Kalantari  
Meysam Vadiati  
Earth Sciences Faculty,  
Shahid Chamran University of Ahvaz,  
Golestan Blvd, Ahvaz,  
Khuzestan,  
Iran

The authors regret that the affiliation for Akbar Khedri and Nasrollahh Kalantari was not referenced correctly in their original paper and apologise for any inconvenience caused. The correct affiliation for these authors for this paper can be found above.
